# Supplementary material for: Crosstalk-free graphene–liquid elastomer based printed sensors for unobtrusive respiratory monitoring
Source: Royal Society of Chemistry journal article supplement (doi:10.1039/d3nr04774a), 2024-01-01
Supplement: d3nr04774a1.pdf [file d3nr04774a1.pdf]

## Electronic Supplementary Information

### **Crosstalk Free Graphene-Liquid Elastomer Based Printed Sensor for Unobtrusive Respiratory Monitoring**

Simran Sharma,<sup>a</sup> Ankur Thapa<sup>a</sup>, Sumit Singh,<sup>b</sup> Titash Mondal<sup>a\*</sup>

<sup>a</sup> *Rubber Technology Centre, Indian Institute of Technology Kharagpur, Kharagpur, India-721302*

<sup>b</sup> *Anton Paar India Pvt. Ltd., Gurgaon, India-122016*

*Corresponding Author: [titash@rtc.iitkgp.ac.in](mailto:titash@rtc.iitkgp.ac.in)*

**(a)**

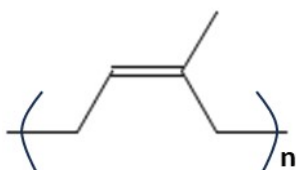

**(b)**

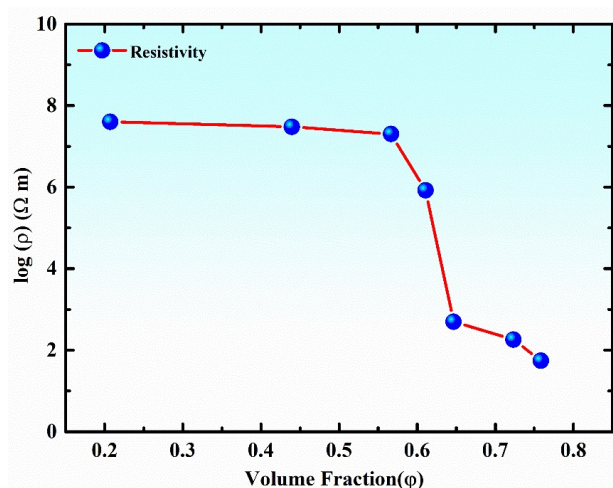

**Fig. S1: (a)** polyisoprene unit **(b)** Electrical resistivity plot for different composition against the filler volume fraction

**Table S1:** Conductivity and standard deviation for different volume fraction samples

| <b>Volume Fraction</b> | <b>Log (<math>\sigma</math>)</b> | <b>Std Deviation (3 samples)</b> |
|------------------------|----------------------------------|----------------------------------|
| 0.21                   | -7.60206                         | 0.147                            |
| 0.44                   | -7.47712                         | 0.125                            |
| 0.56                   | -7.30103                         | 0.167                            |
| 0.61                   | -5.91908                         | 0.165                            |
| 0.67                   | -2.69897                         | 0.100                            |
| 0.72                   | -2.26007                         | 0.115                            |

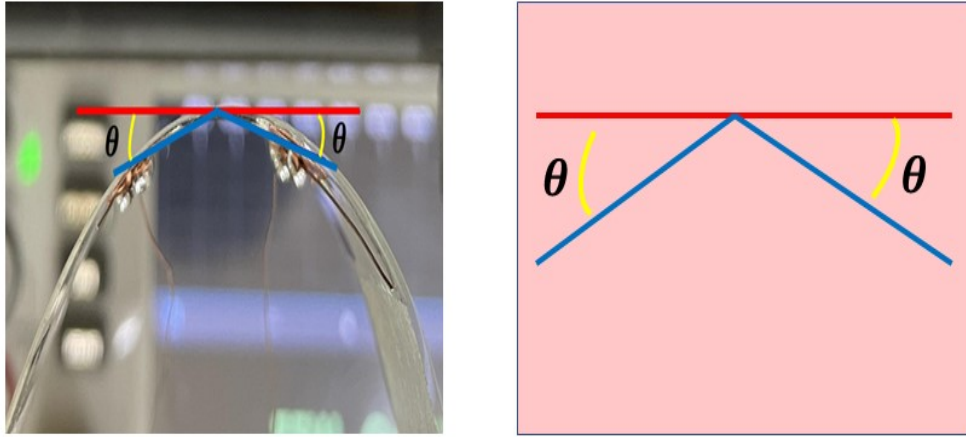

**Fig. S2:** Bending of the samples at different angles using the in house fabricated device.

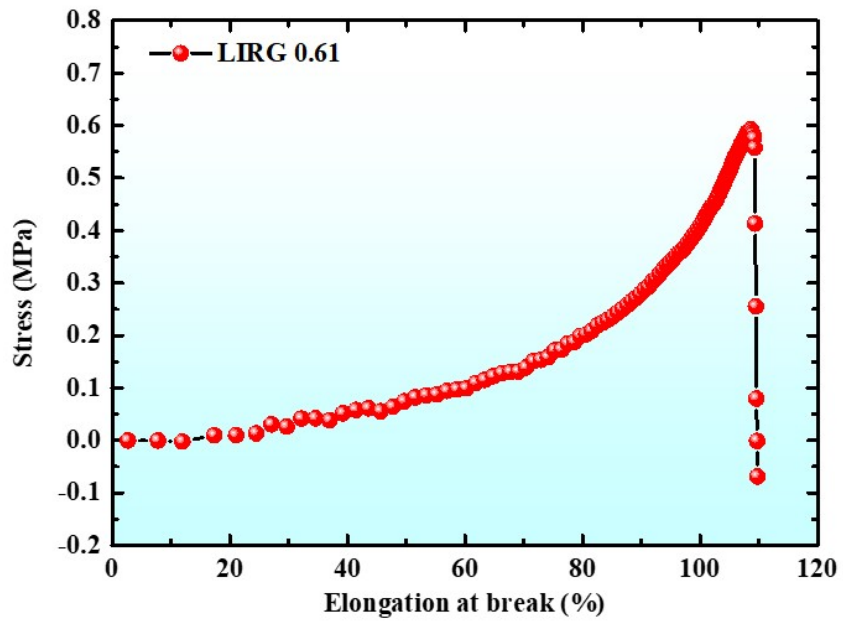

**Fig. S3:** Tensile strength and Elongation at Break for LIRG 0.61 sensor

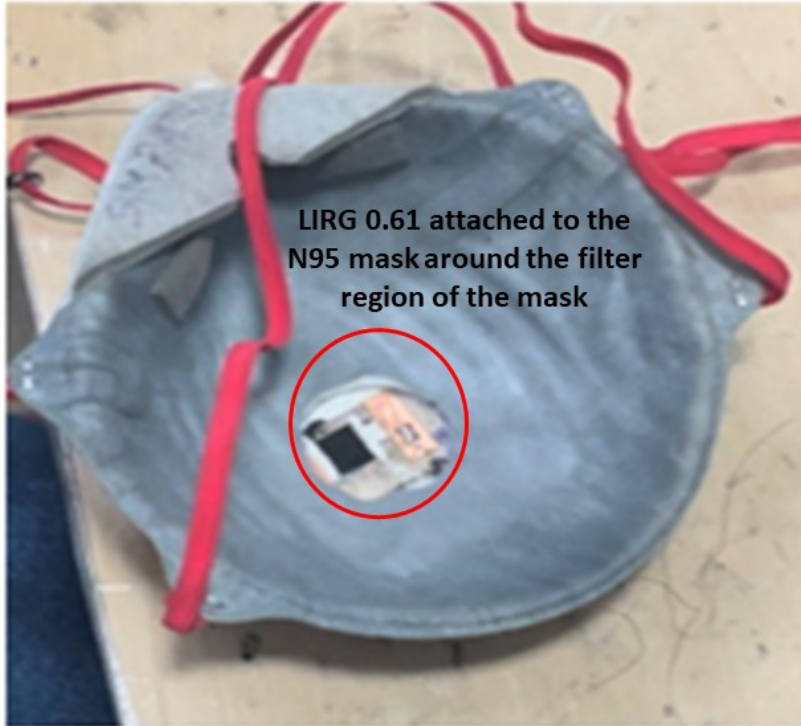

**Fig. S4:** N 95 mask attached with the LIRG 0.61 sample.

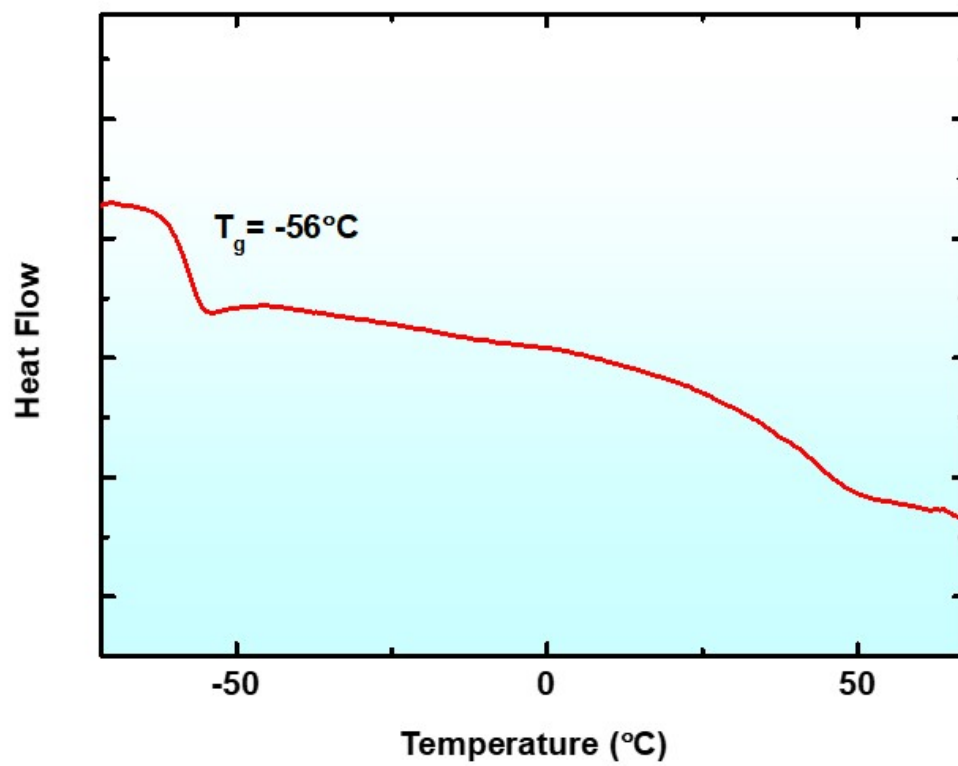

**Fig. S5:** DSC trace of the LIRG 0.61 sample.

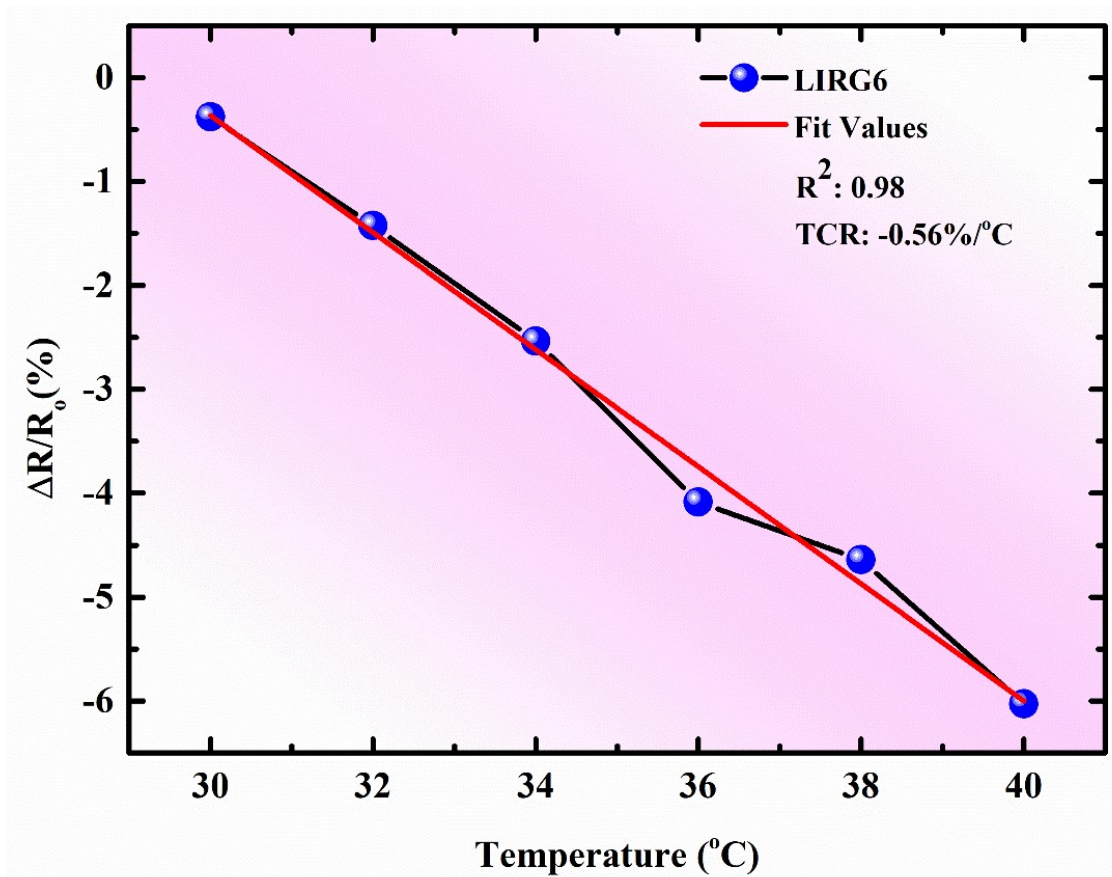

**Fig. S6:** Thermal sensitivity of LIRG 0.61 sensor.

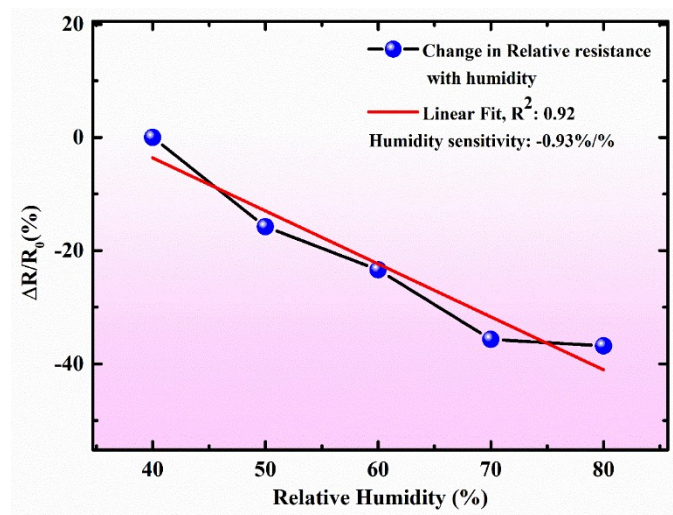

**Fig. S7:** Impact of Humidity on the LIRG 0.61 sample

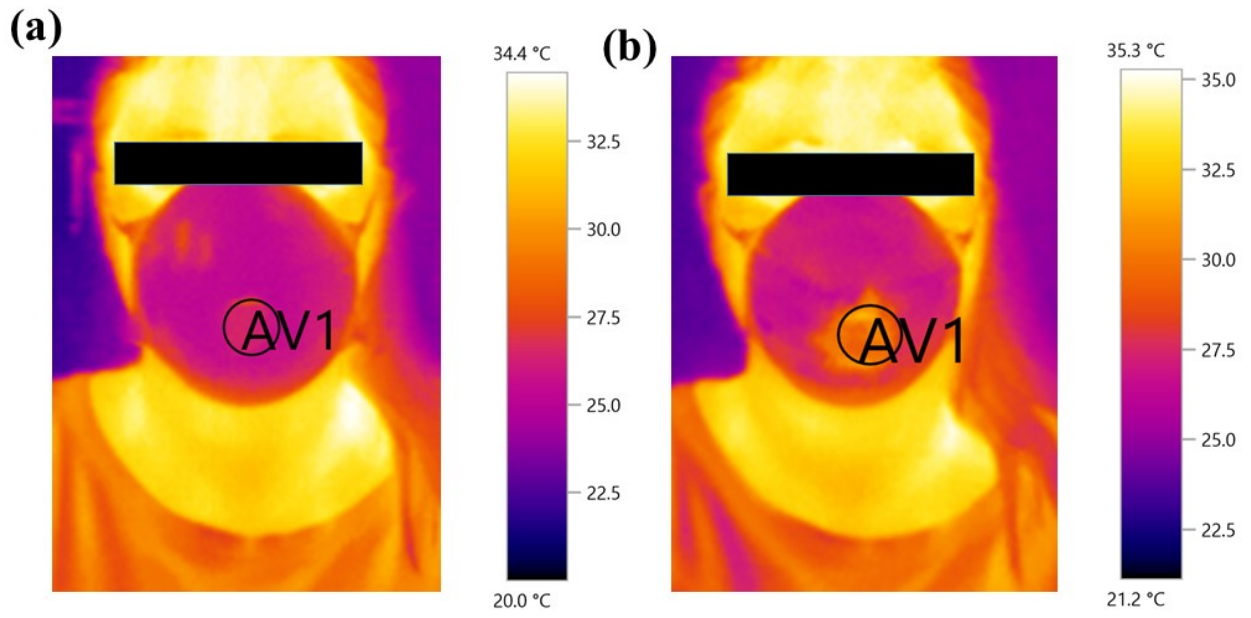

**Fig. S8:** Infra-red image of the mask during (a) inhalation, and (b) exhalation demonstrating the increase in temperature during the breathing.



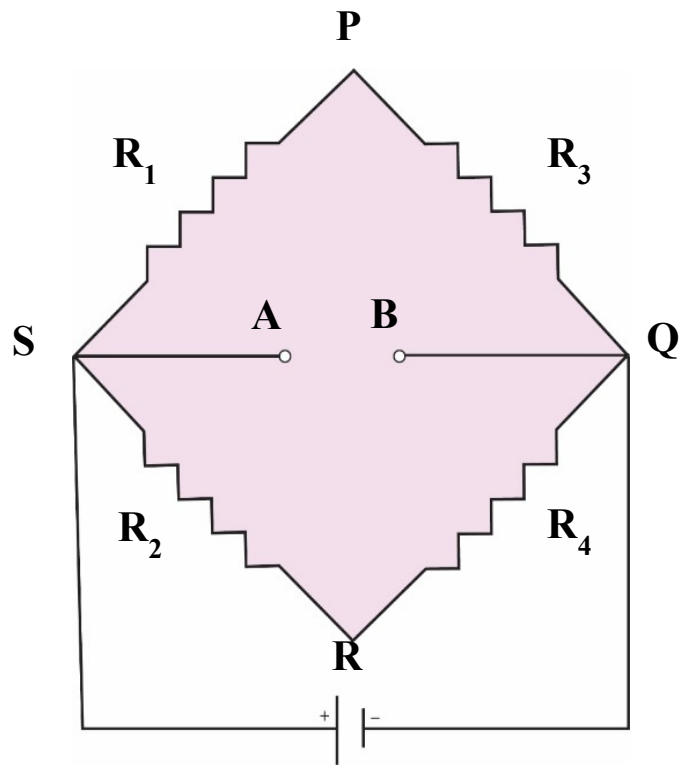

**Fig. S9:** Wheatstone bridge arrangement for the sensors

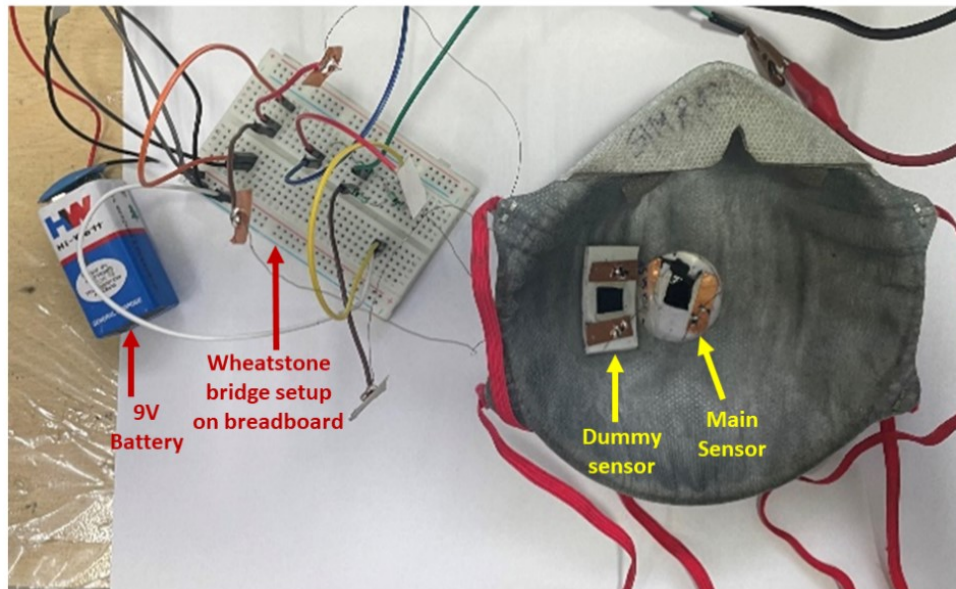

**Fig. S10:** Wheatstone bridge arrangement for the sensors over the mask

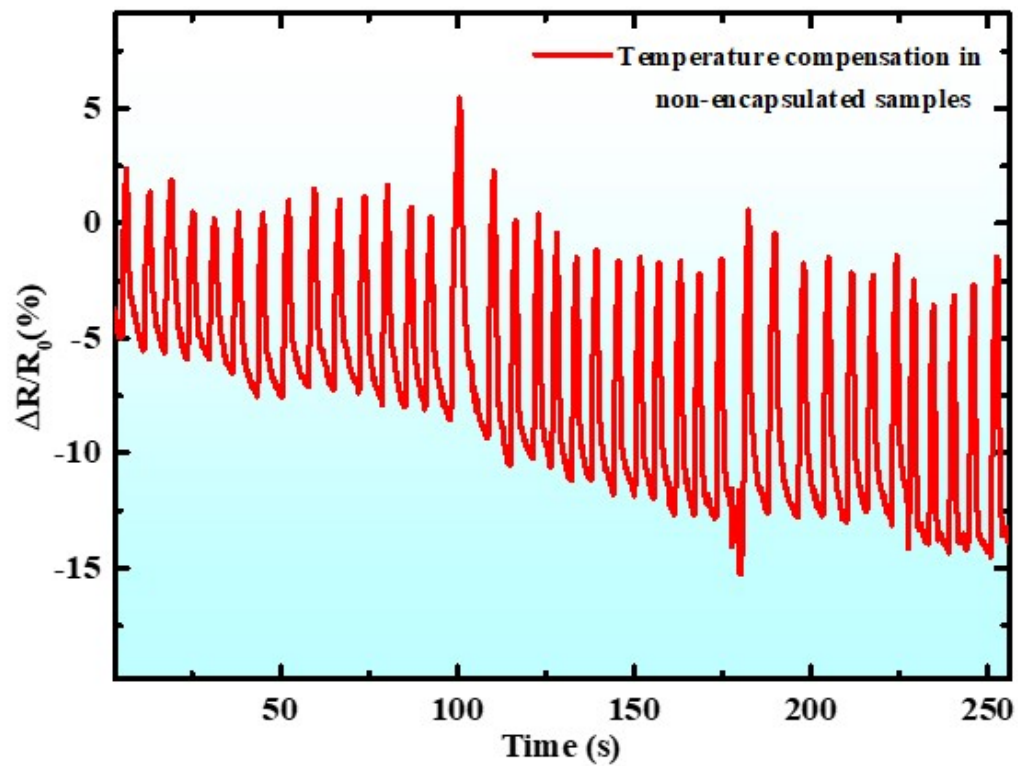

Fig. S11: Temperature-compensated signal output for non-encapsulated samples

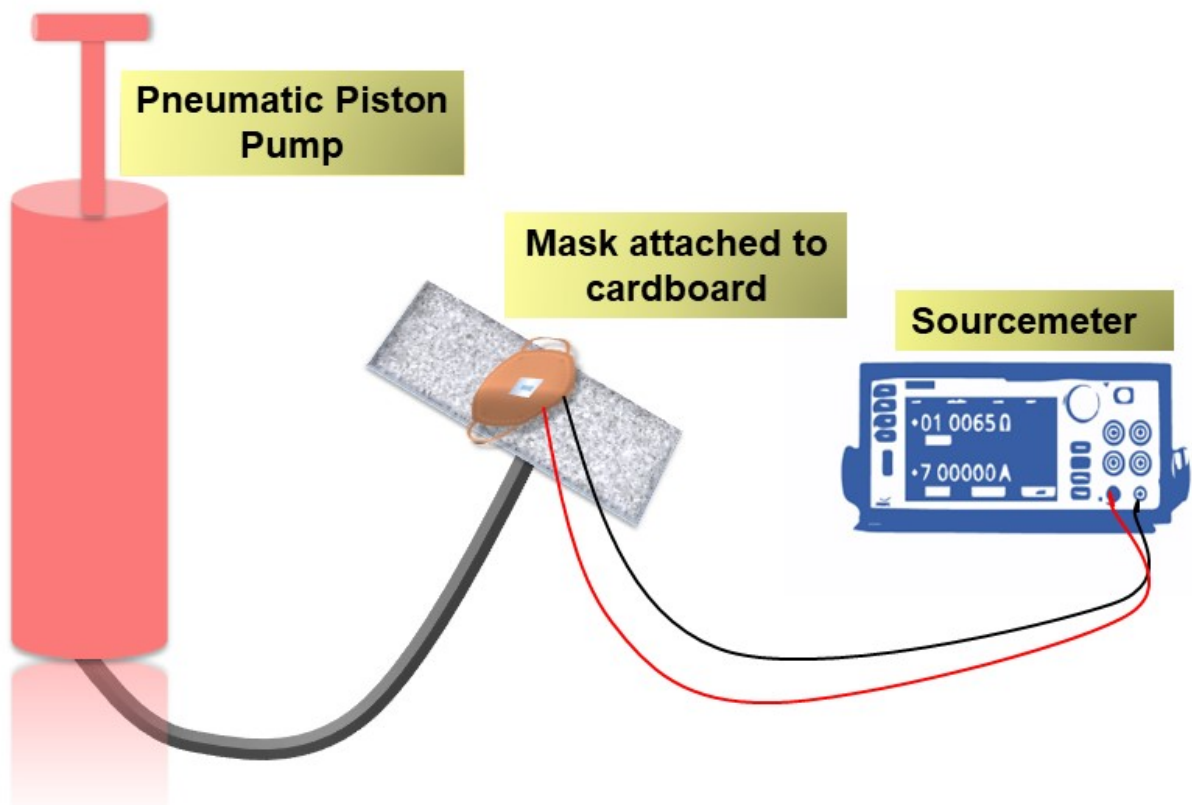

**Fig. S12:** Simulated breathing on mask set-up with the aid of air pump

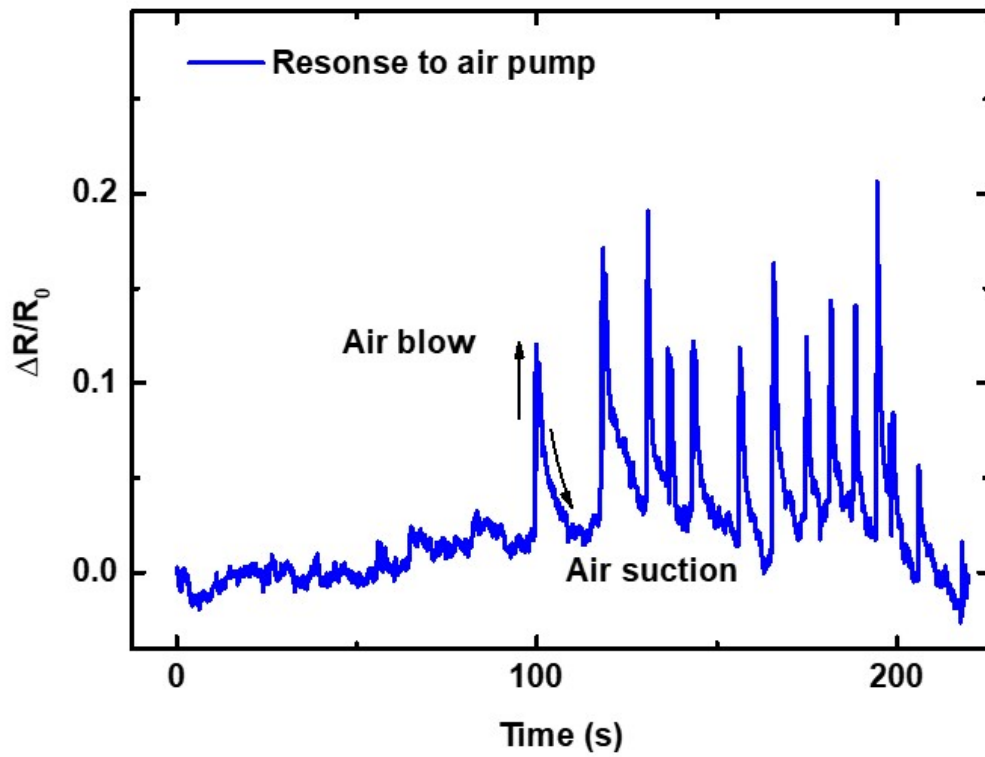

**Fig. S13:** Relative resistance change with simulated breathing experiment

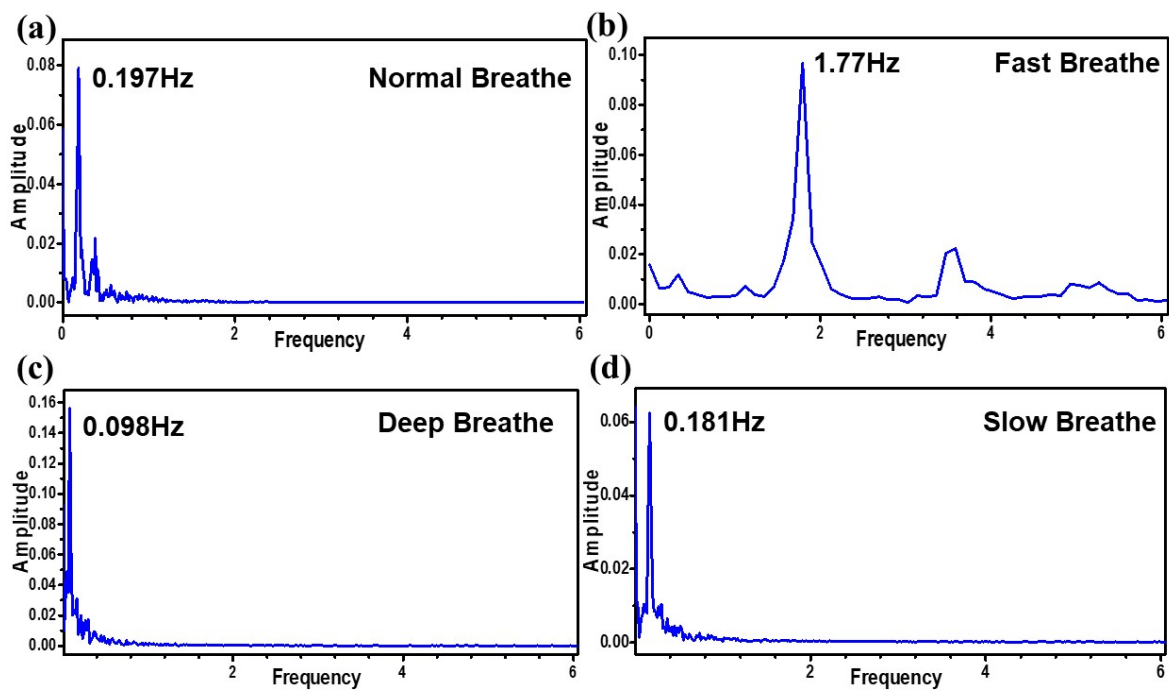

**Fig. S14.** Fast Fourier Transform (FFT) of the transformed signals respectively for (a) Normal, (b) fast, (c) deep and (d) fast breathing.

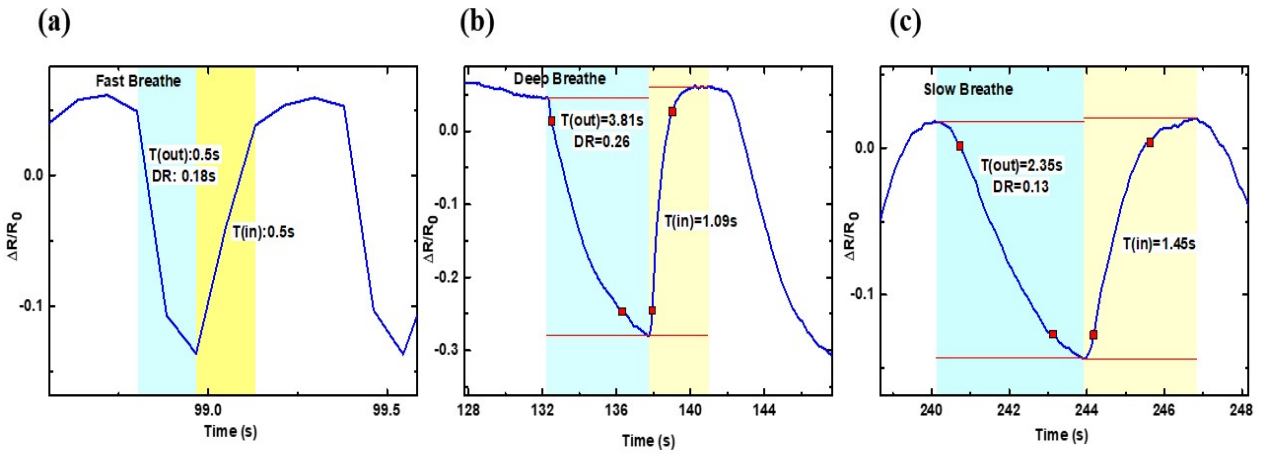

**Fig. S15:** Expanded breathing signal obtained after the application of encapsulant and wheatstone bridge for fast, deep and slow breathing.

**Table S2:** Quantitative analysis of breathing parameters before and after the removal of cross-talk

| Breathing Type                                                                   | RR | Average DR | T <sub>in</sub> | T <sub>out</sub> | Total Breath Time | (I:E)=<br>T <sub>in</sub> :T <sub>out</sub> | SNR    |
|----------------------------------------------------------------------------------|----|------------|-----------------|------------------|-------------------|---------------------------------------------|--------|
| <b>Normal<br/>(After Encapsulation &amp; Wheatstone<br/>bridge application)</b>  | 12 | 0.18       | 0.72            | 2.48             | 3.2               | 1:3.4                                       | -12.85 |
| <b>Normal<br/>(Before Encapsulation &amp;<br/>Wheatstone bridge application)</b> | 13 | 0.059      | 0.65            | 0.44             | 1.09              | 1.5:1                                       | -21.48 |

**Table S3:**  
analysis of I:E  
literature

| Breathing Type                                   | T <sub>in</sub> | T <sub>out</sub> | (I:E)=<br>T <sub>in</sub> /T <sub>out</sub> |
|--------------------------------------------------|-----------------|------------------|---------------------------------------------|
| <b>Reference [1]</b>                             | 630ms           | 730ms            | 0.86                                        |
| <b>Reference [2]</b>                             | -               | -                | 0.8                                         |
| <b>Reference [3]</b>                             | 0.88            | 1.178            | 0.74                                        |
| <b>This work<br/>(before cross-talk removal)</b> | 0.65            | 0.44             | 1.47                                        |
| <b>This work<br/>(After cross-talk removal)</b>  | 0.72s           | 2.4s             | 0.29                                        |

**Comparative  
from the**



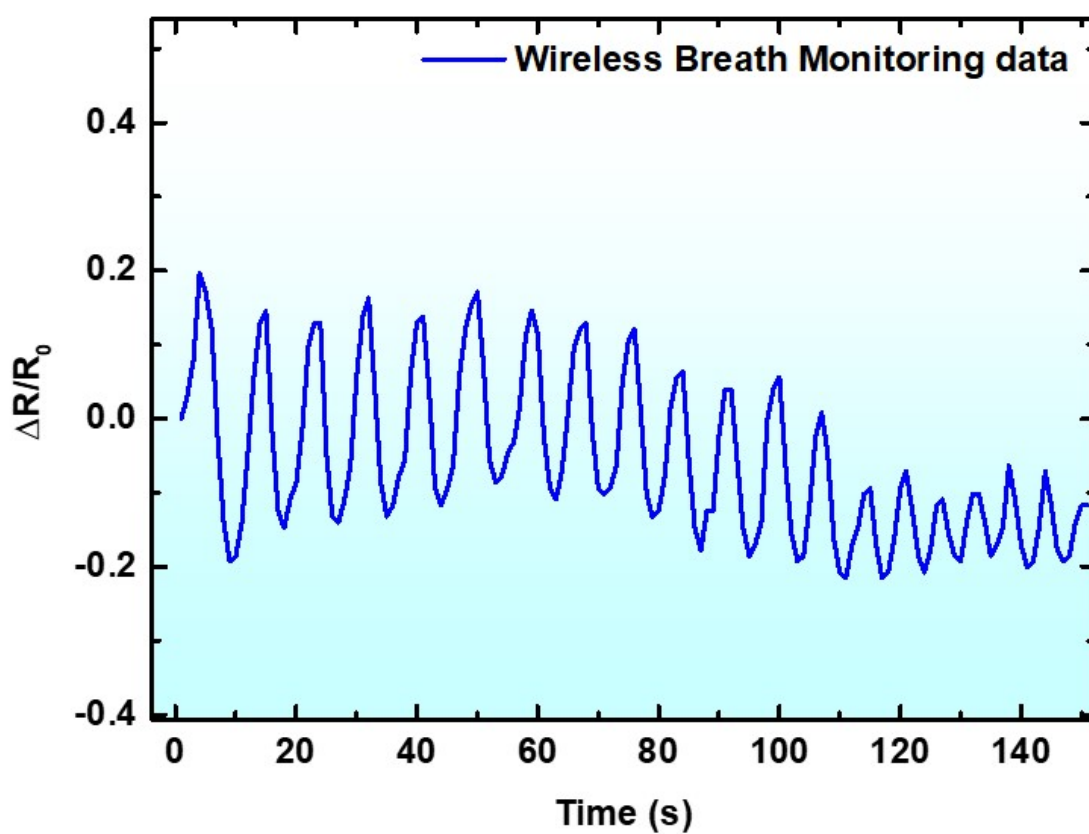

**Fig. S16:** Plot of wireless monitoring signal data received via. Bluetooth module onto the smartphone.

**Table S4: Comparative analysis of mask-based respiratory sensors**

| S.No | Mask-based Sensing Mechanism | Sensing Material                                                      | Fabrication Route             | Sub-ambient Respiration monitoring | Sensitivity                                                                       | Solvent Used | Reference |
|------|------------------------------|-----------------------------------------------------------------------|-------------------------------|------------------------------------|-----------------------------------------------------------------------------------|--------------|-----------|
| 1    | Humidity                     | CsPbBr <sub>3</sub>                                                   | Spin-coating                  | No                                 | 1.5565%/RH%                                                                       | Yes          | 4         |
| 2    | Triboelectric                | Acrylonitrile butadiene styrene                                       | 3D printing                   | No                                 | Upto 6.614 nA/KPa                                                                 | No           | 5         |
| 3    | Humidity                     | Graphdiyne                                                            | Spray Printing                | No                                 | 140% ( $\Delta I/I_0$ )                                                           | Yes          | 1         |
| 4    | Humidity                     | Carbon nanotubes                                                      | Ultrasonic assisted anchoring | No                                 | $<\Delta R/R_0\%=30$ at 95% RH                                                    | Yes          | 6         |
| 5    | Humidity                     | Copper wire/Coolmax yarn/ PENTAS yarn/ Cleancool yarn/ polyimide yarn | Yarn ply                      | No                                 | Upto 82.40 pF/% RH                                                                | No           | 7         |
| 6    | Humidity                     | Mxene/MWCNT                                                           | Drop coating                  | No                                 | $<\text{Response}\%=250\%$ at 90%RH                                               | Yes          | 2         |
| 7    | Temperature                  | Cr/Au/PDMS                                                            | Photolithography/Spin casting | No                                 | Thermal index= 3786K                                                              | Yes          | 8         |
| 8    | Pressure                     | Graphene                                                              | Solution casting              | No                                 | Upto 17.2 kPa <sup>-1</sup> in range 0-20 kPa                                     | Yes          | 9         |
| 9    | Pressure                     | MXene                                                                 | Screen printing               | No                                 | 509.5 or 344.0 kPa <sup>-1</sup> , a low limit (~1 Pa) & (100 kPa)                | Yes          | 10        |
| 10   | Strain                       | Graphene/carbon black/SWCNT                                           | Dip Coating                   | No                                 | Guage factor= 2.14 in range 0-100% strain                                         | Yes          | 11        |
| 11   | Strain                       | Graphene                                                              | Stencil Printing              | Yes                                | Guage factor= -196.56 (0-0.17 %) strain and 117.49 in (0.17-0.34 %) strain region | No           | This work |

## References

- (1) Li, Y.; Zhang, M.; Hu, X.; Yu, L.; Fan, X.; Huang, C.; Li, Y. Graphdiyne-Based Flexible Respiration Sensors for Monitoring Human Health. *Nano Today* **2021**, *39*. <https://doi.org/10.1016/j.nantod.2021.101214>
- (2) Xing, H.; Li, X.; Lu, Y.; Wu, Y.; He, Y.; Chen, Q.; Liu, Q.; Han, R. P. S. MXene/MWCNT Electronic Fabric with Enhanced Mechanical Robustness on Humidity Sensing for Real-Time Respiration Monitoring. *Sens Actuators B Chem* **2022**, *361*. <https://doi.org/10.1016/j.snb.2022.131704>.
- (3) Thiagarajan, K.; Rajini, R. K.; Maji, D.; Flexible, highly sensitive Paper-based Screen Printed MWCNT/PDMS Composite Breath Sensor for Human Respiratory Monitoring **2021**. *IEEE Sensors J.* 21(13), 13985 – 13995. <https://doi.org/10.1109/JSEN.2020.3040995>
- (4) Wu, Z.; Yang, J.; Sun, X.; Wu, Y.; Wang, L.; Meng, G.; Kuang, D.; Guo, X. Z.; Qu, W.; Du, B.; Liang, C.; Fang, X.; Tang, X.; He, Y. An Excellent Impedance-Type Humidity Sensor Based on Halide Perovskite CsPbBr<sub>3</sub> Nanoparticles for Human Respiration Monitoring. *Sens Actuators B Chem* **2021**, *337*. <https://doi.org/10.1016/j.snb.2021.129772>.
- (5) Yun, J.; Park, J.; Jeong, S.; Hong, D.; Kim, D. A Mask-Shaped Respiration Sensor Using Triboelectricity and a Machine Learning Approach toward Smart Sleep Monitoring Systems. *Polymers (Basel)* **2022**, *14* (17). <https://doi.org/10.3390/polym14173549>.
- (6) Huang, X.; Li, B.; Wang, L.; Lai, X.; Xue, H.; Gao, J. Superhydrophilic, Underwater Superoleophobic, and Highly Stretchable Humidity and Chemical Vapor Sensors for Human Breath Detection. *ACS Appl Mater Interfaces* **2019**, *11* (27), 24533–24543. <https://doi.org/10.1021/acsami.9b04304>.
- (7) Ma, L.; Wu, R.; Patil, A.; Zhu, S.; Meng, Z.; Meng, H.; Hou, C.; Zhang, Y.; Liu, Q.; Yu, R.; Wang, J.; Lin, N.; Liu, X. Y. Full-Textile Wireless Flexible Humidity Sensor for Human Physiological Monitoring. *Adv Funct Mater* **2019**, *29* (43). <https://doi.org/10.1002/adfm.201904549>.
- (8) Liu, Y.; Zhao, L.; Avila, R.; Yiu, C.; Wong, T.; Chan, Y.; Yao, K.; Li, D.; Zhang, Y.; Li, W.; Xie, Z.; Yu, X. Epidermal Electronics for Respiration Monitoring via Thermo-Sensitive Measuring. *Materials Today Physics* **2020**, *13*. <https://doi.org/10.1016/j.mtphys.2020.100199>.

- (9) Tao, L. Q.; Zhang, K. N.; Tian, H.; Liu, Y.; Wang, D. Y.; Chen, Y. Q.; Yang, Y.; Ren, T. L. Graphene-Paper Pressure Sensor for Detecting Human Motions. *ACS Nano* **2017**, *11* (9), 8790–8795. <https://doi.org/10.1021/acsnano.7b02826>.
- (10) Yang, L.; Wang, H.; Yuan, W.; Li, Y.; Gao, P.; Tiwari, N.; Chen, X.; Wang, Z.; Niu, G.; Cheng, H. Wearable Pressure Sensors Based on MXene/Tissue Papers for Wireless Human Health Monitoring. *ACS Appl Mater Interfaces* **2021**, *13* (50), 60531–60543. <https://doi.org/10.1021/acсами.1c22001>.
- (11) Huang, Y.; Zhao, Y.; Wang, Y.; Guo, X.; Zhang, Y.; Liu, P.; Liu, C.; Zhang, Y. Highly Stretchable Strain Sensor Based on Polyurethane Substrate Using Hydrogen Bond-Assisted Laminated Structure for Monitoring of Tiny Human Motions. *Smart Mater Struct* **2018**, *27* (3). <https://doi.org/10.1088/1361-665X/aaaba0>.
